# Supplementary material for: Protective efficacy and safety of liver stage attenuated malaria parasites
Source: PubMed Central journal article supplement (PMC4886212; doi:10.1038/srep26824), 2016-05-31
Supplement: srep26824-s1.pdf [file srep26824-s1.pdf]

Supplementary material for

**Protective efficacy and safety of liver stage attenuated malaria parasites**

Hirdesh Kumar, Julia Magdalena Sattler, Mirko Singer, Kirsten Heiss,  
Miriam Reinig, Christiane Hammerschmidt-Kamper, Volker Heussler,  
Ann-Kristin Mueller and Friedrich Frischknecht

**Contents:**

- Supplementary Fig. S1**
- Supplementary Fig. S2**
- Supplementary Fig. S3**
- Supplementary Fig. S4**
- Supplementary Table S1**
- Supplementary Table S2**

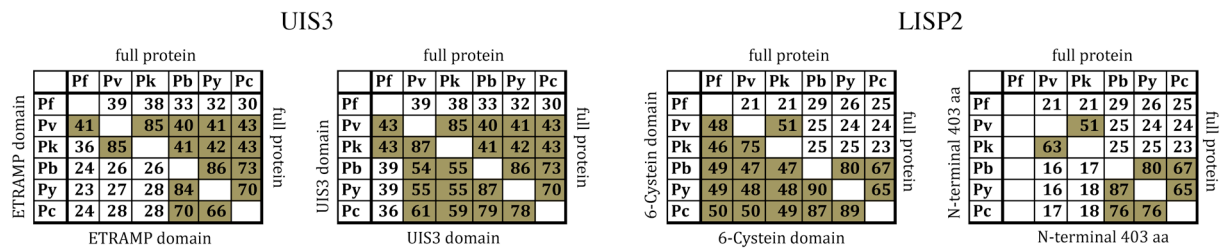

**Figure S1: Percentage identity matrices of UIS3 and LISP2 in different *Plasmodium* species.**

Pf: *P. falciparum* 3D7; Pv: *P. vivax* Sal1; Pk: *P. knowlesii*; Pb: *P. berghei* ANKA; Py: *P.*

*yoelii* 17X; Pc: *P. chabaudi chabaudi*. Dark cells represent sequences with >40% amino acid

identity. Upper half matrix: full length proteins; lower half matrix: ETRAMP and UIS3

domains as well as 6-cystein domain and 403 amino acid N-terminal region. An N-terminal

region in *P. falciparum* could not be identified.

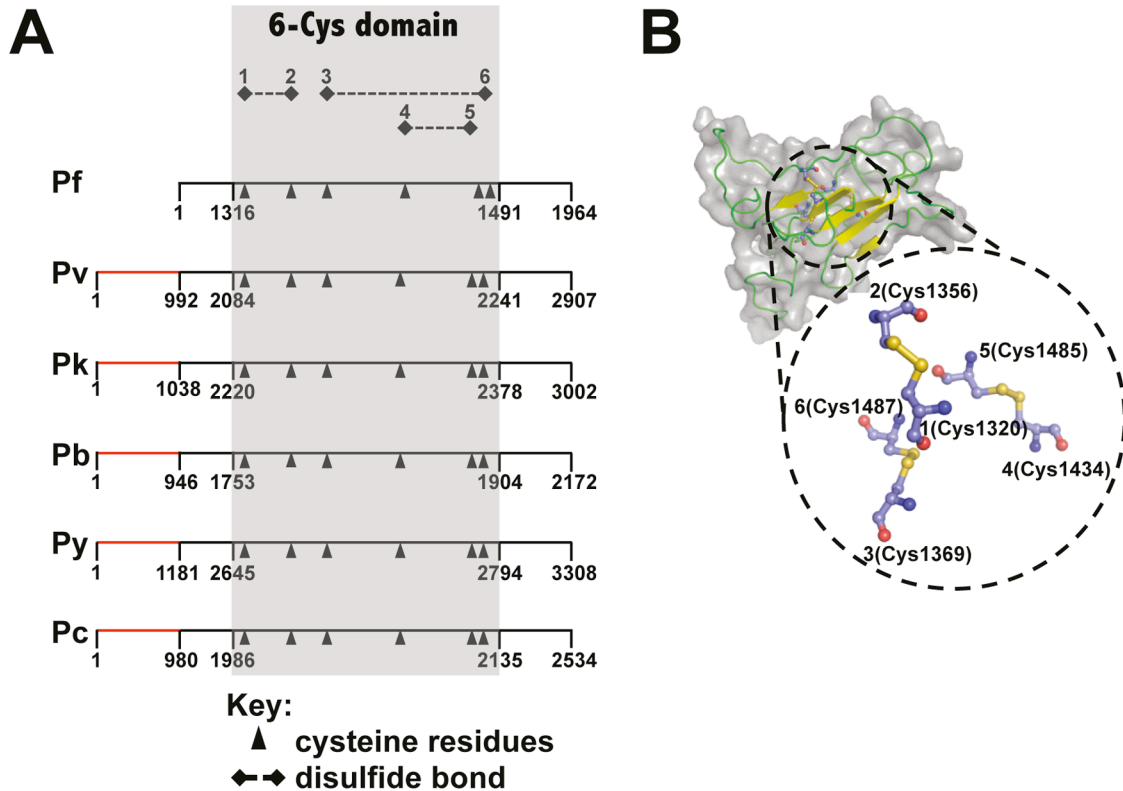

**Figure S2: Predicted structure of the 6-cystein domain of LISP2.**

(A) Representative layout of LISP2 amino acid sequences in different *Plasmodium* species (Pf: *P. falciparum*, Pv: *P. vivax*, Pk: *P. knowlesii*, Pb: *P. berghei*, Py: *P. yoelii*, Pc: *P. chabaudi*). The 6-Cys domains predicted using SMART server, is highlighted in grey. Numbers below the gene models indicate amino acid positions.

(B) Homology model of the 6-Cys domain in *PfLISP2* (corresponding to the grey region in B) predicted by BhageerathH server. The characteristic  $\beta$ -sandwich is shown in a ribbon diagram, overlapped with the surface view (grey). The predicted loop region is hidden for clarity. The enlarged view depicts 6-conserved cysteine residues (arrow head in B), forming 3 disulfide bonds.

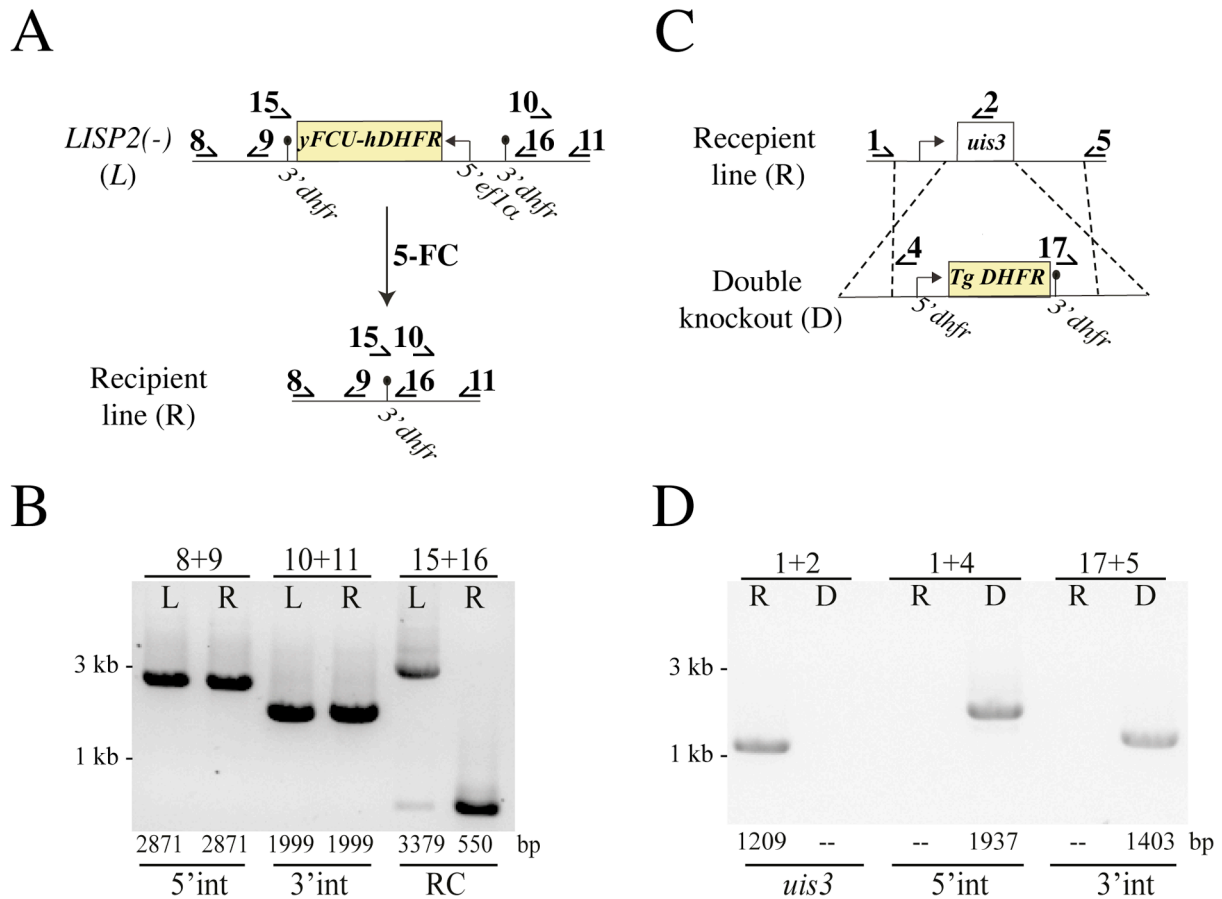

**Figure S3: Negative selection of *LISP2(-)* parasites to remove resistance marker and generation of the *LISP2(-)/uis3(-)* double knockout parasite line.**

(A) Schematic of the removal of the selection cassette by negative selection using 5-Fluorocytosine (5-FC). Primers used for diagnostic PCR reactions in B are indicated.

(B) Diagnostic PCR reactions and expected amplicon sizes.

(C) Schematic of the *uis3* deletion strategy using the 5' and 3'UTRs of *uis3* to integrate a resistance cassette by double crossover into the *LISP2(-)* parasite genome. The locations of primers used for PCR in D are indicated.

(D) Diagnostic PCR reactions and expected amplicon sizes.

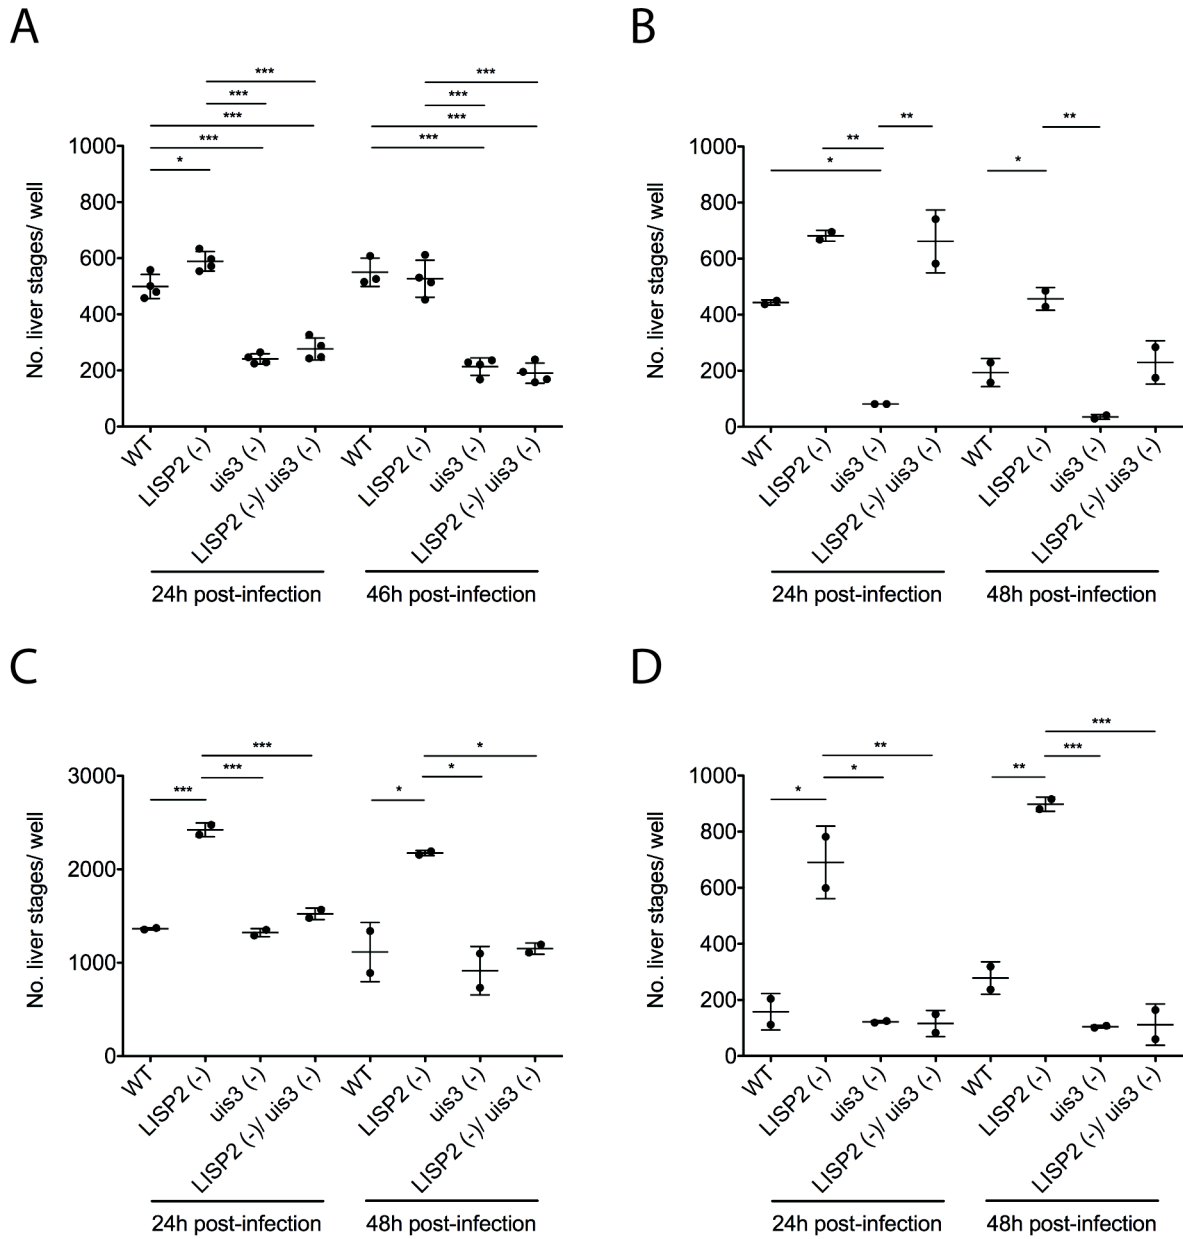

**Figure S4: Characterization of a ANKA *LISP2*(-)/*uis3*(-) double knockout parasite line and comparison with single knockout lines in four individual liver stage assays.**

(A) Number of liver stages per well 24 and 46 hours post infection (hpi) of HepG2 cells with WT, *LISP2*(-), *uis3*(-) and *LISP2*(-)/*uis3*(-) sporozoites. Four individual wells were counted. Mean numbers ( $\pm$  SD) are shown.

(B-D) Number of liver stages per well 24 and 48 hours post infection (hpi) of HepG2 cells with WT, *LISP2*(-), *uis3*(-) and *LISP2*(-)/*uis3*(-) sporozoites. Two individual wells per assay were counted. Mean numbers ( $\pm$  SD) are shown.

**Supplementary Table 1: Primers used in this study.**

| Used for                           | No.       |                  | Restriction Enzymes      | Sequence                                                                 |
|------------------------------------|-----------|------------------|--------------------------|--------------------------------------------------------------------------|
| <b><i>PbA uis3</i> (-)</b>         |           |                  |                          |                                                                          |
| 5' UTR                             | uis3-5'f  |                  | <i>EcoRI</i>             | <b>CGGAATTC</b> GCTAGCATTAGCATAACATCTCATTGGC                             |
|                                    | uis3-5'r  |                  | <i>KpnI</i>              | GGGGT <b>ACC</b> GCATGCAACCACAACATAAAACAAAATTAATG                        |
| 3' UTR                             | uis3-3'f- |                  | <i>PstI</i>              | AA <b>CTGCAGG</b> CCTGTACACTATATTGTATATTAGC                              |
|                                    | uis3-3'r  |                  | <i>HindIII</i>           | CCCA <b>AGCTT</b> CCCATCTACGCCTTTTATGCTT                                 |
| Test-WT                            | 1         | Test-5'f         | --                       | TGCTATAAAAGCGTATTATGAATTAATATAAAAGG                                      |
|                                    | 2         | uis3- r          | --                       | GTCCTGATGATAACAAAGCAATTGCAAC                                             |
| Test-5'Int                         | 1         | Test-uis3-5'f    | --                       | TGCTATAAAAGCGTATTATGAATTAATATAAAAGG                                      |
|                                    | 3         | Test-uis3-5'r    | --                       | GGCCCCGTTTTTCTTACTTATATATTTATACCAATTG                                    |
| Test-3'Int                         | 4         | Test-uis3-3'f    | --                       | GTCCATACAACATATATCCGAAC                                                  |
|                                    | 5         | Test-uis3-3'r    | --                       | GTATTTATGCCAAAAAAGCTAAATTGC                                              |
| <b><i>PbA lisp2</i> (-)</b>        |           |                  |                          |                                                                          |
| 5'UTR                              | lisp2-5'f |                  | <i>Sall</i>              | AT <b>CGTCTGACT</b> GGTATCCATTATAGCAGCAAACAC                             |
|                                    | lisp2-5'r |                  | <i>EcoRI</i>             | GTCAC <b>GAATTC</b> AATTTGTTTGCACGCTTTATCG                               |
| 3'UTR                              | lisp2-3'f |                  | <i>HindIII</i>           | ACCG <b>AAGCTT</b> TGTTTGGACATAATGAATACGATGG                             |
|                                    | lisp2-3'r |                  | <i>XhoI</i>              | ACCG <b>CTCGAG</b> CCACGGATGCACTAATAGAAGC                                |
| Test-gene                          | 6         | lisp2-gene-f     | <i>NheI</i>              | AT <b>GCTAGCAT</b> GAAAGATCATATAAAAAATGTATGCTTTCCG                       |
|                                    | 7         | lisp2-gene-r     | <i>BamHI</i>             | AC <b>GGATCCC</b> GTGTTTCTTTCTTTTTCTCG                                   |
| Test-5'Int                         | 8         | Test-lisp2-5'f   | --                       | TTGTGCACCCTCGTATACTG                                                     |
|                                    | 9         | Test-lisp2-5'r   | --                       | ACGCAACCTTATATTCCTCAATTAC                                                |
| Test-3'Int                         | 10        | Test-lisp2-3'f   | --                       | CATACTAGCCATTTTATGTG                                                     |
|                                    | 11        | Test-lisp2-3'r   | --                       | GAAGCAACTATGAAAAAACTAATGGG                                               |
| RC                                 | 15        | Test hdfr-r      | --                       | GCCGATATCCAAGAAAGCTGGGTGGTACCC                                           |
|                                    | 16        | Test hdfr-f      | --                       | CCCAAGCTTCAAAAAAGCAGGCTTGCCGC                                            |
| <b><i>N-LISP2</i></b>              |           |                  |                          |                                                                          |
| Gene-insert                        | 6         | N-lisp2-f        | <i>NheI</i>              | AT <b>GCTAGCAT</b> GAAAGATCATATAAAAAATGTATGCTTTCCG                       |
|                                    | 7         | N-lisp2-r        | <i>BamHI</i>             | AC <b>GGATCCC</b> GTGTTTCTTTCTTTTTCTCG                                   |
| Promoter-insert                    |           | lisp2-Prom-f     | <i>XhoI, NotI, SacII</i> | AA <b>ACTCGAGGCGGCCG</b> CAA <b>ACC</b> GCGGGAGTTGCATTATC<br>GTCAAAAAGTG |
| 3'insert                           | lisp2-3-f |                  | <i>HindIII</i>           | AAAA <b>AAGCTT</b> AGAGCTACCAAAATTTAAAGAAAATCC                           |
|                                    | lisp2-3'r |                  | <i>XhoI</i>              | ACCG <b>CTCGAG</b> CCACGGATGCACTAATAGAAGC                                |
| Test-gene                          | 6         | N-lisp2-f        | <i>NheI</i>              | AT <b>GCTAGCAT</b> GAAAGATCATATAAAAAATGTATGCTTTCCG                       |
|                                    | 7         | N-lisp2-r        | <i>BamHI</i>             | AC <b>GGATCCC</b> GTGTTTCTTTCTTTTTCTCG                                   |
| Test-5'Int                         | 8         | Test-Nlisp2-5'f  | --                       | TTGTGCACCCTCGTATACTG                                                     |
|                                    | 12        | Test-N-lisp2-5'r | --                       | CGCAATTTGTTGTACATAAAATAGGC                                               |
| Test-3'Int                         | 6         | Test-N-lisp2-3'f | <i>NheI</i>              | AT <b>GCTAGCAT</b> GAAAGATCATATAAAAAATGTATGCTTTCCG                       |
|                                    | 11        | Test-lisp2-3'r   | --                       | GAAGCAACTATGAAAAAACTAATGGG                                               |
| RC                                 | 13        | Test hdfr-r      | --                       | GCCGATAT <b>CCA</b> AGAAAGCTGGGTGGTACCC                                  |
|                                    | 14        | Test hdfr-f      | --                       | CCCA <b>AGCTT</b> CAAAAAAGCAGGCTTGCCGC                                   |
| <b><i>PbA LISP2(-)/uis3(-)</i></b> |           |                  |                          |                                                                          |
| Test-gene                          | 1         |                  | --                       | TGCTATAAAAGCGTATTATGAATTAATATAAAAGG                                      |
|                                    | 2         |                  | --                       | GTATTTATGCCAAAAAAGCTAAATTGC                                              |
| Test-5'Int                         | 1         |                  | --                       | TGCTATAAAAGCGTATTATGAATTAATATAAAAGG                                      |
|                                    | 4         |                  | --                       | GTCCATACAACATATATCCGAAC                                                  |
| Test-3'Int                         | 17        |                  | --                       | AAAGCTAGCTTTGATCCCCGTTTTTC                                               |
|                                    | 5         |                  | --                       | GTATTTATGCCAAAAAAGCTAAATTGC                                              |

**Supplementary Table 2:** Total number of i.v. injected sporozoites and mice.

| <b>Attenuated parasite line<br/>(<i>P. berghei</i><br/>ANKA)</b> | <b>Mice*</b> | <b>Injected sporozoites</b> | <b>Break-through infections</b> | <b>Total number of injected sporozoites</b> |
|------------------------------------------------------------------|--------------|-----------------------------|---------------------------------|---------------------------------------------|
| <i>LISP2(-)</i>                                                  | 15           | 10.000                      | -                               | 2.230.000                                   |
|                                                                  | 14           | 20.000                      | -                               |                                             |
|                                                                  | 17           | 30.000                      | 1                               |                                             |
|                                                                  | 12           | 50.000                      | -                               |                                             |
|                                                                  | 1            | 220.000                     | -                               |                                             |
|                                                                  | 1            | 470.000                     | -                               |                                             |
| <i>uis3(-)</i>                                                   | 14           | 20.000                      | 3                               | 2.470.000                                   |
|                                                                  | 16           | 30.000                      | -                               |                                             |
|                                                                  | 12           | 50.000                      | 3                               |                                             |
|                                                                  | 3            | 220.000                     | -                               |                                             |
|                                                                  | 1            | 450.000                     | -                               |                                             |
| <i>LISP2(-)</i><br><i>/uis3(-)</i>                               | 14           | 20.000                      | -                               | 4.870.000                                   |
|                                                                  | 16           | 30.000                      | -                               |                                             |
|                                                                  | 9            | 50.000                      | -                               |                                             |
|                                                                  | 1            | 100.000                     | -                               |                                             |
|                                                                  | 7            | 200.000                     | -                               |                                             |
|                                                                  | 3            | 220.000                     | -                               |                                             |
|                                                                  | 6            | 250.000                     | -                               |                                             |
| <i>N-LISP2</i>                                                   | 4            | 10.000                      | 4                               | 160.000                                     |
|                                                                  | 4            | 30.000                      | 4                               |                                             |

\*all mice injected with sporozoites were naïve
